# Supplementary material for: Economic Analysis of Thermal–Catalytic Process of Palm Oil (Elaeis guineesensis, Jacq) and Soap Phase Residue from Neutralization Process of Palm Oil (Elaeis guineensis, Jacq)
Source: MDPI journal article supplement (doi:10.3390/en16010492), 2023-01-02
Supplement: s1 [file s1]

## Article

# Economic Analysis of Thermal–Catalytic Process of Palm Oil (*Elaeis guineensis*, Jacq) and Soap Phase Residue from Neutralization Process of Palm Oil (*Elaeis guineensis*, Jacq)

Anderson Rocha Amaral <sup>1</sup>, Lucas Pinto Bernar <sup>1</sup>, Caio Campos Ferreira <sup>1</sup>, Anderson Mathias Pereira <sup>1</sup>, Wanderson Gomes dos Santos <sup>1</sup>, Lia Martins Pereira <sup>1</sup>, Marcelo Costa Santos <sup>1</sup>, Fernanda Paula da Costa Assunção <sup>2</sup>, Neyson Martins Mendonça <sup>3</sup>, José Almir Rodrigues Pereira <sup>3</sup>, Sílvia Alex Pereira da Mota <sup>4</sup>, Andréia de Andrade Mâncio <sup>4</sup>, Sergio Duvoisin Junior <sup>5</sup>, Luiz Eduardo Pizarro Borges <sup>6</sup>, Nélvio Teixeira Machado <sup>1,2,3,\*</sup> and Douglas Alberto Rocha de Castro <sup>7</sup>

<sup>1</sup> Graduate Program of Natural Resources Engineering of Amazon, Campus Profissional-UFPA, Universidade Federal do Pará, Rua Augusto Corrêa N° 1, Belém 66075-110, Brazil

<sup>2</sup> Graduate Program of Civil Engineering, Campus Profissional-UFPA, Universidade Federal do Pará, Rua Augusto Corrêa N° 1, Belém 66075-110, Brazil

<sup>3</sup> Faculty of Sanitary and Environmental Engineering, Campus Profissional-UFPA, Universidade Federal do Pará, Rua Corrêa N° 1, Belém 66075-900, Brazil

<sup>4</sup> Graduate Program of Chemistry, Universidade Federal do Sul e Sudeste do Pará, Folha 31, Quadra 7, Lote Especial—Nova Marabá, Marabá/PA 68507-590, Brazil

<sup>5</sup> Faculty of Chemical Engineering, Universidade do Estado do Amazonas-UEA, Avenida Darcy Vargas N°. 1200, Manaus 69050-020, Brazil

<sup>6</sup> Laboratory of Catalyst Preparation and Catalytic Cracking, Section of Chemical Engineering, Instituto Militar de Engenharia-IME, Praça General Tibúrcio N°. 80, Rio de Janeiro 22290-270, Brazil

<sup>7</sup> Centro Universitário Luterano de Manaus—CEULM/ULBRA, Avenida Carlos Drummond de Andrade N°. 1460, Manaus 69077-730, Brazil

\* Correspondence: machado@ufpa.br; Tel.: +55-91-984-620-325

## Supplementary Tables

**Table S1.** Yields of thermal catalytic cracking of crude palm oil (*Elaeis guineensis*, Jacq) at 450 °C, 1.0 atmosphere, and 10% (wt.) Na<sub>2</sub>CO<sub>3</sub> as catalyst, and distillation of organic liquid products (OLP) [26–31].

| Process                    | Yield<br>[wt.%] |
|----------------------------|-----------------|
| Thermal catalytic cracking | 75.00           |
| Organic Liquid Products    | 63.60           |
| Solids                     | 8.00            |
| Gas                        | 28.40           |
| Distillation of OLP        | 60.00           |

**Table S2.** Physicochemical properties of crude palm oil used as raw by thermal catalytic cracking at 450 °C, 1.0 atmosphere, and 10% (wt.) Na<sub>2</sub>CO<sub>3</sub> as catalyst [26–31].

| Properties                      | CPO<br>Na <sub>2</sub> CO <sub>3</sub> 10% (wt.) |
|---------------------------------|--------------------------------------------------|
| Density [g/cm <sup>3</sup> ]    | 0.95                                             |
| Kinematic viscosity [cSt]       | 2.90                                             |
| Acidity index [mg KOH/g]        | 8.98                                             |
| Saponification index [mg KOH/g] | 9.19                                             |
| Ester index [mg KOH/g]          | 0.21                                             |
| Free fatty acids – AFF [%]      | 4.51                                             |
| Refractive index                | 1.45                                             |
| Melting point [°C]              | 19.10                                            |
| Corrosiveness                   | 1A                                               |
| Water and Sediment [%]          | *                                                |
| Carbon residue [%]              | 0.73                                             |

**Table S3.** Chemical compositional of distillation fraction within the temperature range 40 °C - 175 °C (biogasoline), described in terms of oxygenated and hydrocarbons, of OLP obtained by thermal catalytic cracking at 450 °C, 1.0 atmosphere, and 10% (wt.) Na<sub>2</sub>CO<sub>3</sub> as catalyst [26–31].

| Compounds                   | Content [area.%] |
|-----------------------------|------------------|
| <b>Hydrocarbons</b>         | <b>52.76</b>     |
| Normal paraffins            | 15.78            |
| Branched paraffins          | 0                |
| Naphthenico                 | 3.50             |
| Aromatics                   | 1.94             |
| Olefins                     | 31.54            |
| <b>Oxygenated compounds</b> | <b>47.24</b>     |
| Others                      | 47.24            |

**Table S4.** Chemical compositional of distillation fraction within the temperature range 175 °C – 235 °C (biokerosene), described in terms of oxygenated and hydrocarbons, of OLP obtained by thermal catalytic cracking soap crude palm oil at 450 °C, 1.0 atmosphere, and 10% (wt.) Na<sub>2</sub>CO<sub>3</sub> as catalyst [26–31].

| Compounds                   | Content [area.%] |
|-----------------------------|------------------|
| <b>Hydrocarbons</b>         | <b>86.37</b>     |
| Normal paraffins            | 19.48            |
| Branched paraffins          | 0                |
| Naphthenico                 | 19.63            |
| Aromatics                   | 7.04             |
| Olefins                     | 40.22            |
| <b>Oxygenated compounds</b> | <b>13.63</b>     |
| Others                      | 13.63            |

**Table S5.** Chemical compositional of distillation fraction within the temperature range 235 °C – 305 °C (light green diesel), described in terms of oxygenated and hydrocarbons, of OLP obtained by thermal catalytic cracking of at 450 °C, 1.0 atmosphere, and 10% (wt.) Na<sub>2</sub>CO<sub>3</sub> as catalyst [26–31].

| Compounds                   | Content [area.% ] |
|-----------------------------|-------------------|
| <b>Hydrocarbons</b>         | <b>91.38</b>      |
| Normal paraffins            | 31.27             |
| Branched paraffins          | 0                 |
| Naphthenico                 | 5.67              |
| Aromatics                   | 0                 |
| Olefins                     | 54.44             |
| <b>Oxygenated compounds</b> | <b>8.62</b>       |
| Others                      | 8.62              |

**Table S6.** Chemical compositional of distillation fraction within the temperature range 305 °C – 400 °C (heavy green diesel), described in terms of oxygenated and hydrocarbons, of OLP obtained by thermal catalytic cracking of at 450 °C, 1.0 atmosphere, and 10% (wt.) Na<sub>2</sub>CO<sub>3</sub> as catalyst [26–31].

| Compounds                   | Content [area.% ] |
|-----------------------------|-------------------|
| <b>Hydrocarbons</b>         | <b>70.78</b>      |
| Normal paraffins            | 25.30             |
| Branched paraffins          | 0                 |
| Naphthenico                 | 9.64              |
| Aromatics                   | 0                 |
| Olefins                     | 35.84             |
| <b>Oxygenated compounds</b> | <b>29.22</b>      |
| Others                      | 29.22             |

**Table S7.** Yields of thermal catalytic cracking of palm oil neutralizing sludge (*Elaeis guineensis*, Jacq) at 450 °C, 1.0 atmosphere, and 15% (wt.) Na<sub>2</sub>CO<sub>3</sub> as catalyst, and distillation of organic liquid products (OLP) [34,35].

| Process                    | Yield [wt.%] |
|----------------------------|--------------|
| Thermal catalytic cracking | 56.25        |
| Organic Liquid Product     | 71.37        |
| Solids                     | 23.55        |
| Gas                        | 0.48         |
| Distillation of OLP        | 60.00        |

**Table S8.** Physicochemical properties of organic liquid product (bio-oil), of experiment 5, thermal catalytic cracking of palm oil neutralizing sludge (*Elaeis guineensis*, Jacq) at 450 °C, 1.0 atmosphere, and 15% (wt.) Na<sub>2</sub>CO<sub>3</sub> as catalyst [34,35].

| Physicochemical properties          | Exp. 5   | Diesel S10<br>(ANP N° 65) |
|-------------------------------------|----------|---------------------------|
| Acidity index [ mg KOH / g ]        | 1.07     | Note                      |
| Refractive index                    | 1.45     | -                         |
| Saponification index [ mg KOH / g ] | 27.52    | -                         |
| Kinematic viscosity [ cSt ]         | 1.90     | 2.0 – 4.5                 |
| Density [ g/ mL ]                   | 0.8      | 0.82 – 0.85               |
| Corrosiveness                       | 1        | 1                         |
| Melting point [ °C ]                | >71      | 38 minimum                |
| Carbon residue [ % ]                | 0.466    | 0.25 (máximo)             |
| Yield of bio-oil* (%)               | 71.37    | -                         |
| Sulphur content                     | 24       | 10 ppm (max)              |
| Color                               | 4        | 3 (max)                   |
| Aspect                              | Approved | Not approved**            |

\* Yield obtained in dry basis (without the water mass generated in the process).

\*\* Clear and free from impurities.

**Table S9.** Chemical composition of organic liquid product (experiment 5), described in terms of oxygenated and hydrocarbons, obtained by thermal catalytic cracking of palm oil neutralizing sludge (*Elaeis guineensis*, Jacq) at 450 °C, 1.0 atmosphere, and 15% (wt.) Na<sub>2</sub>CO<sub>3</sub> as catalyst [34,35].

| Chemical functions          | Composition [area.% ] |
|-----------------------------|-----------------------|
| <b>Hydrocarbons</b>         | <b>91.22</b>          |
| Paraffins                   | 30.75                 |
| Olefíns                     | 53.72                 |
| Naphthenicos                | 4.5                   |
| Aromatics                   | 2.25                  |
| <b>Oxygenated compounds</b> | <b>8.78</b>           |
| Alcohols                    | 2.27                  |
| Ketones                     | 5.34                  |
| Ether                       | 1.17                  |

**Table S10.** The physicochemical properties of distillation fractions of biogasoline (40 °C – 175 °C) and biokerosene (175 °C – 235 °C), of OLP (experiment 5) obtained by thermal catalytic cracking of palm oil neutralizing sludge (*Elaeis guineensis*, Jacq) at 450 °C, 1.0 atmosphere, and 15% (wt.) Na<sub>2</sub>CO<sub>3</sub> as catalyst [34,35].

| Characteristics              | Light fractions |                   | Residue | Diesel S10<br>(ANP N° 65) |
|------------------------------|-----------------|-------------------|---------|---------------------------|
|                              | (40 – 175 °C)   | (175 °C – 235 °C) | -       | Note                      |
| Acidity Index [ mg KOH / g ] | 3.489           | 4.046             | 5.52    | 2.0 – 4.5                 |
| Viscosity [ cSt ]            | 0.14            | 0.17              | 5.52    | 2.0 – 4.5                 |
| Density [ g/ mL ]            | 0.74            | 0.76              | 0.85    | 0.82 – 0.85               |
| Corrosiveness                | 1               | 1                 | 1       | 1                         |
| Flash point [ °C ]           | 37              | 22                | 81      | 38 minimum                |
| Sulphur content [ ppm ]      | 16              |                   |         | 10 [max]                  |
| Color                        | 1               | -                 | -       | 3 [max]                   |
| Aspect                       | Approved        |                   |         | Approved*                 |
| Carbon residue**             | 1.3             | -                 | -       | 0.25 [max]                |

\* Clear and free from impurities.

\*\* Obtained with 10 % ends of the curve of distillation.

**Table S11.** Chemical compositional of distillation fraction within the temperature range 175 °C – 235 °C (heavy green diesel), described in terms of oxygenated and hydrocarbons, of OLP obtained by thermal catalytic cracking of palm oil neutralizing sludge (*Elaeis guineensis*, Jacq) at 450 °C, 1.0 atmosphere, and 15% (wt.) Na<sub>2</sub>CO<sub>3</sub> as catalyst [34,35].

| Compounds                    | Composition [ % ] |
|------------------------------|-------------------|
| Paraffins                    | 30.55             |
| Olefins                      | 49.76             |
| Aromatics                    | 6.92              |
| Naphthenicos                 | 9.27              |
| <b>Total of Hydrocarbons</b> | <b>96.5</b>       |
| Others                       | 3.5               |

**Table S12.** Chemical compositional of distillation fraction within the temperature range 305 °C – 400 °C (heavy green diesel), described in terms of oxygenated and hydrocarbons, of OLP obtained by thermal catalytic cracking of palm oil neutralizing sludge (*Elaeis guineensis*, Jacq) at 450 °C, 1.0 atmosphere, and 15% (wt.) Na<sub>2</sub>CO<sub>3</sub> as catalyst [34,35].

| Compounds                    | Composition [area.% ] |
|------------------------------|-----------------------|
| Paraffins                    | 29.27                 |
| Olefins                      | 56.98                 |
| Aromatics                    | 3.41                  |
| Naphthenicos                 | 3.55                  |
| <b>Total of Hydrocarbons</b> | <b>93.21</b>          |
| Ketones                      | 2.88                  |
| Alcohols                     | 3.91                  |
| <b>Total oxygenated</b>      | <b>6.79</b>           |

**Table S13.** Chemical compositional of distillation fraction within the temperature range 235 °C – 305 °C (light green diesel), described in terms of oxygenated and hydrocarbons, of OLP obtained by thermal catalytic cracking of palm oil neutralizing sludge (*Elaeis guineensis*, Jacq) at 450 °C, 1.0 atmosphere, and 15% (wt.) Na<sub>2</sub>CO<sub>3</sub> as catalyst [34,35].

| Compounds                    | Composition [area.% ] |
|------------------------------|-----------------------|
| Paraffins                    | 33.55                 |
| Olefíns                      | 54.90                 |
| Aromatics                    | 1.52                  |
| Naphthenicos                 | 8.79                  |
| <b>Total of Hydrocarbons</b> | <b>98.76</b>          |
| Others                       | 1.24                  |

**Table S14.** Chemical compositional of distillation fraction within the temperature range 40 °C – 175 °C (biogasoline), described in terms of oxygenated and hydrocarbons, of OLP obtained by thermal catalytic cracking of palm oil neutralizing sludge (*Elaeis guineensis*, Jacq) at 450 °C, 1.0 atmosphere, and 15% (wt.) Na<sub>2</sub>CO<sub>3</sub> as catalyst [34,35].

| Compounds                    | Composition [area.% ] |
|------------------------------|-----------------------|
| Paraffins                    | 34.64                 |
| Olefíns                      | 51.09                 |
| Aromatics                    | 5.85                  |
| Naphthenicos                 | 8.42                  |
| <b>Total of Hydrocarbons</b> | <b>100</b>            |
